# Supplementary material for: General and Specific Cytotoxicity of Chimeric Antisense Oligonucleotides in Bacterial Cells and Human Cell Lines
Source: MDPI journal article supplement (doi:10.3390/antibiotics13020122), 2024-01-26
Supplement: s1 [file s1]

## **Supplementary Material**

### **General and specific cytotoxicity of chimeric antisense oligonucleotides in bacterial cells and human cell lines**

**Katya B. Popova and Robert Penchovsky\***

Laboratory of Synthetic Biology and Bioinformatics, Faculty of Biology,

Sofia University “St. Kliment Ohridski”, Sofia, Bulgaria

\*To whom the correspondence should be addressed:

Laboratory of Synthetic Biology and Bioinformatics,

Faculty of Biology,

Sofia University “St. Kliment Ohridski”,

8 Dragan Tzankov Blvd.,

1164 Sofia, Bulgaria

Office Phone: +35928167340

E-mail: robert.penchovsky@hotmail.com

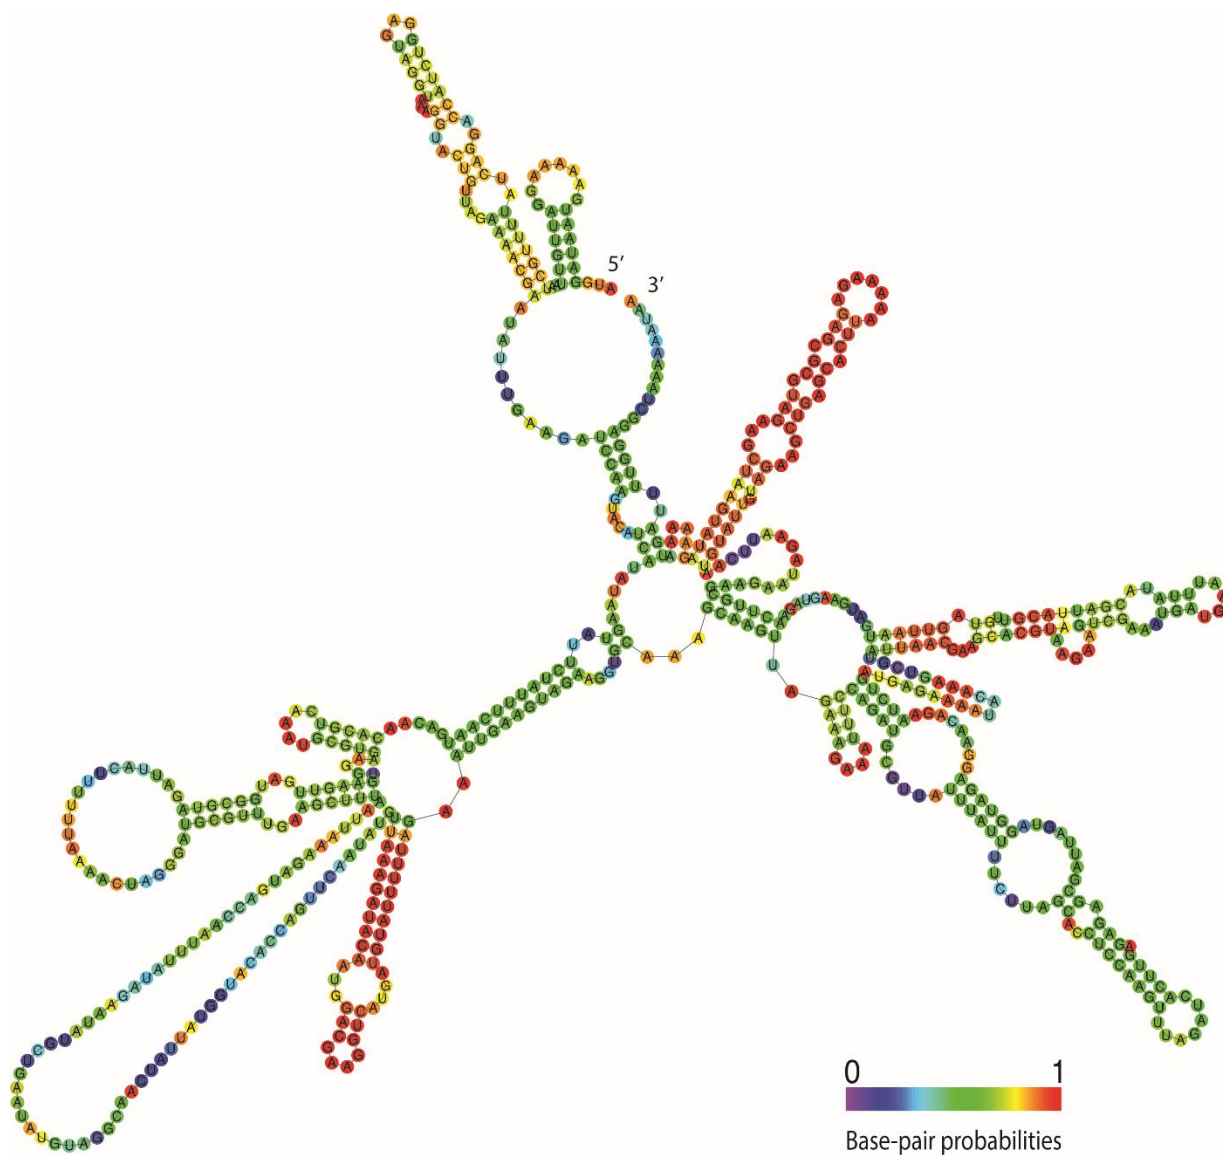

**Figure S1.** A partition structure of the folding of the mRNA, encoding guanylate kinase in *S. aureus* (strain ATCC 25 923). The model structure is obtained by the RNAfold web server version 2.4.8.

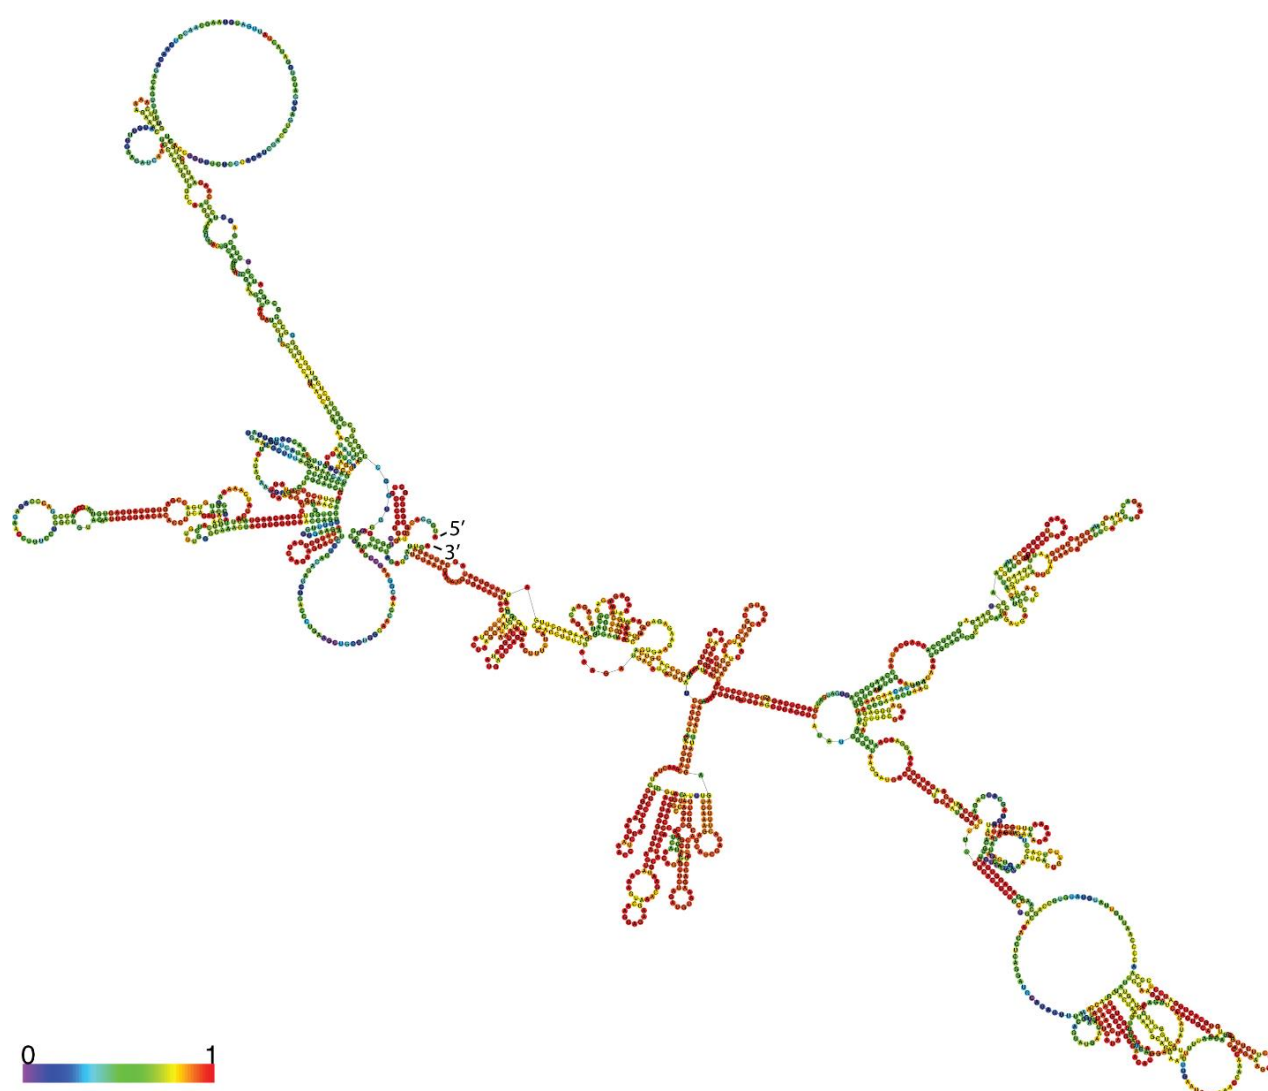

**Figure S2.** Partition structure of the folding of the mRNA, encoding Homo sapiens UBA2 gene. The model structure is obtained by the RNAfold web server version 2.4.8.

RNA Reference Sequence (RefSeq) was performed for ASO1's target (5'-AAUUAGGUAAAGAAGCAAAAUC) in the GeneBank database to compare it with the curated data in both human and bacterial organisms. The blast results demonstrate the absence of full 100% query coverage in other bacterial organisms with the targeted sequence in the guanylate kinase region in *S. aureus*. Due to varying mismatches, the highest % of similarity is 68%, and it is observed as demonstrated in **Figure S5A**:

- *Prolinoborus fasciculus* (syn. *Aquaspirillum fasciculus*)
- *Legionella lansingensis*

The same analysis was performed for similarities in the human organism. The results demonstrated a maximum % query coverage of 90% with the targeted sequence in the predicted ncRNA 2778 (LINC02778), followed by 81% in transcript variant X3 in LOC105372520 ncRNA (LOC105372520).

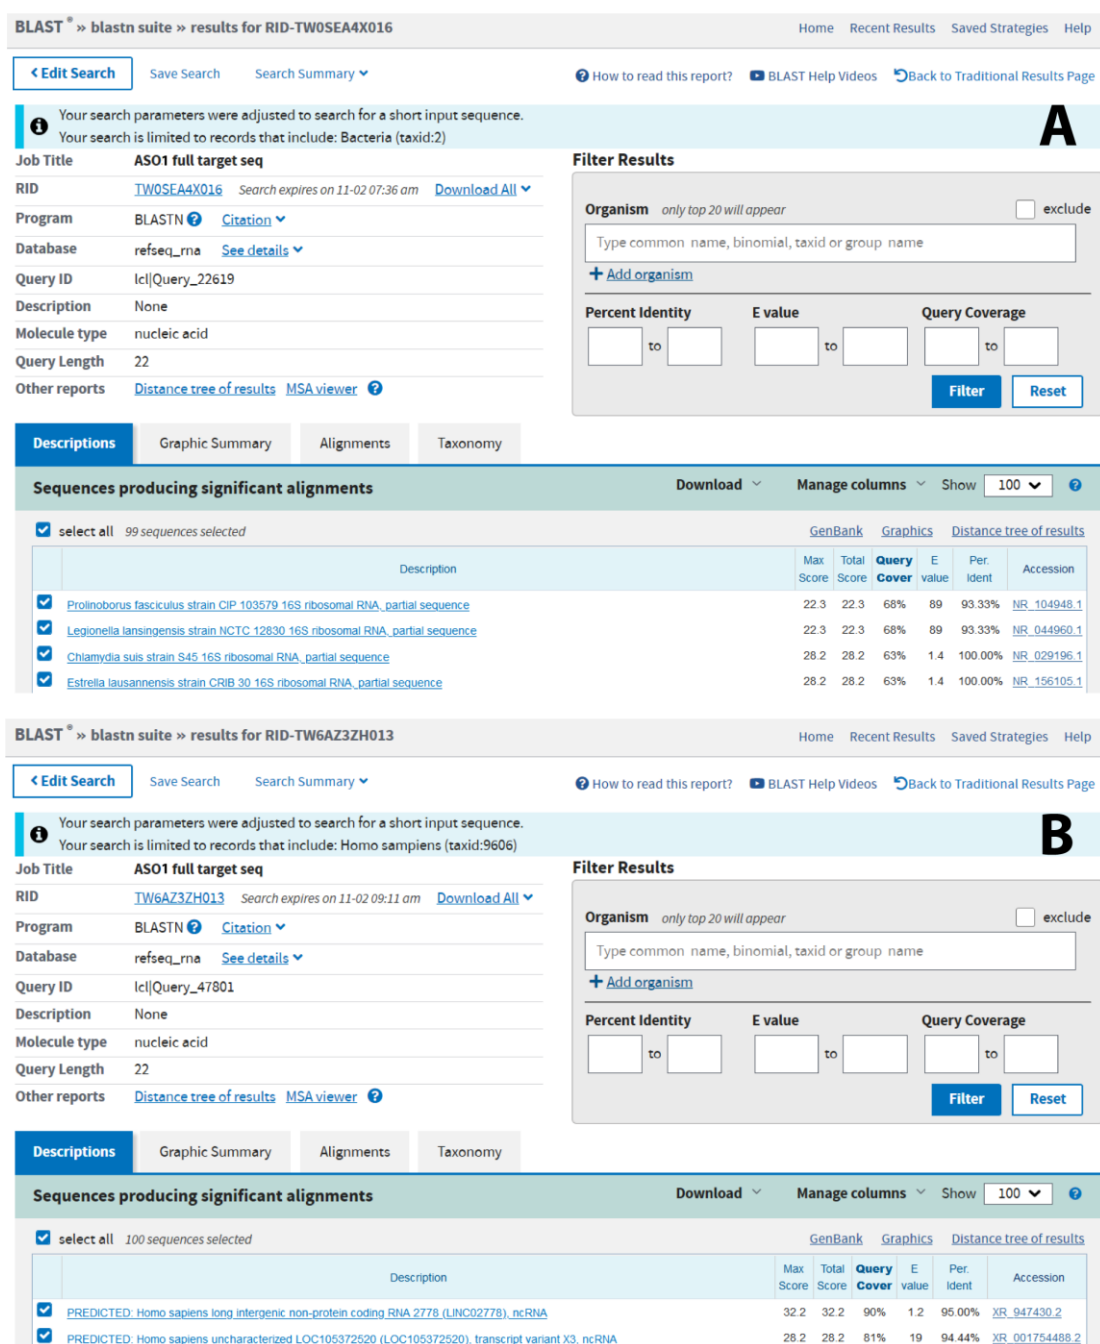

**Figure S3. RNA Reference Sequence (RefSeq) analysis for similarities of ASO1's target with bacterial and human organisms in the GeneBank database. (A) RefSeq results for similarities of ASO1's target with bacterial microorganisms. (B) RefSeq for similarities of ASO1's target within the human organism.**

RNA Reference Sequence (RefSeq) was performed for ASO2's target (5'-AATGAAGCAAGAAAAGAAGTTG) in the GeneBank database to compare it with the

curated data in both human and bacterial organisms. The BLAST results demonstrate the absence of full 100% query coverage in other bacterial organisms with the targeted sequence in the guanylate kinase region in *S. aureus*. Due to varying mismatches, the highest % of similarity is 86%, which is observed in the Gram-negative *Candidatus blochmannia*, as demonstrated in Figure S5A.

The same analysis was performed for similarities in the human organism. The results demonstrated a maximum % query coverage of 72% between the targeted sequence when there are no gaps (100% identity) and the following:

- 3 transcript variants of the Rho GTPase activating protein 30 mRNA (1, 3, and 4);
- 4 predicted transcript variants of the Rho GTPase activating protein 30 mRNA (X1, X2, X3, and X4);
- 2 predicted transcript variants of uncharacterized LOC105377508 ncPHK (1 and 2).

However, if we allow aligning the results with some gaps or mismatches instead of a 100% identity score, we have several hits that might explain our experimental data. They are in transcription variant of the proto-oncogene BRAF (95% query cover, 95.24% identity), purine-rich element binding protein B (PURB) mRNA (90% query cover, 95% identity), and transcription variants of the center (CNTLN) mRNA (90% query cover, 95% identity). There were also several more predicted variants of those targets among the results.

BLAST® » blastn suite » results for RID-TWBC371G013

Home Recent Results Saved Strategies Help

[< Edit Search](#) [Save Search](#) [Search Summary](#) [How to read this report?](#) [BLAST Help Videos](#) [Back to Traditional Results Page](#)

**1** Your search parameters were adjusted to search for a short input sequence.  
Your search is limited to records that include: Bacteria (taxid:2)

**A**

Job Title \*\*\*\*\*6 full target seq in Bacteria

RID TWBC371G013 Search expires on 11-02 10:37 am [Download All](#)

Program BLASTN [Citation](#)

Database refseq\_ma [See details](#)

Query ID lcl|Query\_2689

Description None

Molecule type nucleic acid

Query Length 22

Other reports [Distance tree of results](#) [MSA viewer](#)

**Filter Results**

Organism only top 20 will appear ☐ exclude

Type common name, binomial, taxid or group name

[+ Add organism](#)

Percent Identity  to  E value  to  Query Coverage  to

[Filter](#) [Reset](#)

Descriptions Graphic Summary Alignments Taxonomy

Sequences producing significant alignments

Download Manage columns Show 100

☒ select all 99 sequences selected

|                                     | Description                                                                                        | GenBank   | Graphics    | Distance tree of results                |
|-------------------------------------|----------------------------------------------------------------------------------------------------|-----------|-------------|-----------------------------------------|
|                                     |                                                                                                    | Max Score | Total Score | Query Cover E value Per ident Accession |
| <input checked="" type="checkbox"/> | <a href="#">Candidatus Blochmannia vafer strain RVAF 23S ribosomal RNA gene, complete sequence</a> | 22.3      | 42.6        | 86% 89 100.00% NR_076781.1              |
| <input checked="" type="checkbox"/> | <a href="#">Cyanobacterium sp. PCC 10605 strain PCC 10605 23S ribosomal RNA, complete sequence</a> | 24.3      | 64.9        | 72% 23 100.00% NR_102522.1              |

BLAST® » blastn suite » results for RID-TWBB78RJ01R

Home Recent Results Saved Strategies Help

[< Edit Search](#) [Save Search](#) [Search Summary](#) [How to read this report?](#) [BLAST Help Videos](#) [Back to Traditional Results Page](#)

**1** Your search parameters were adjusted to search for a short input sequence.  
Your search is limited to records that include: Homo sapiens (taxid:9606)

**B**

Job Title Nucleotide Sequence

RID 3JUF0F2J01R Search expires on 02-28 04:36 am [Download All](#)

Program BLASTN [Citation](#)

Database refseq\_ma [See details](#)

Query ID lcl|Query\_304595

Description None

Molecule type nucleic acid

Query Length 22

Other reports [Distance tree of results](#) [MSA viewer](#)

**Filter Results**

Organism only top 20 will appear ☐ exclude

Type common name, binomial, taxid or group name

[+ Add organism](#)

Percent Identity  to  E value  to  Query Coverage  to

[Filter](#) [Reset](#)

Descriptions Graphic Summary Alignments Taxonomy

Sequences producing significant alignments

Download Select columns Show 100

☒ select all 100 sequences selected

|                                     | Description                                                                                                            | Scientific Name              | Max Score | Total Score | Query Cover | E value | Per ident | Acc. Len | Accession                      |
|-------------------------------------|------------------------------------------------------------------------------------------------------------------------|------------------------------|-----------|-------------|-------------|---------|-----------|----------|--------------------------------|
| <input checked="" type="checkbox"/> | <a href="#">Homo sapiens R-Raf proto-oncogene, serine/threonine kinase (BRAF), transcript variant 13, mRNA</a>         | <a href="#">Homo sapiens</a> | 34.2      | 34.2        | 95%         | 0.18    | 95.24%    | 5062     | <a href="#">NM_001378474.1</a> |
| <input checked="" type="checkbox"/> | <a href="#">PREDICTED: Homo sapiens uncharacterized LOC105372310 (LOC105372310), transcript variant X4, ncRNA</a>      | <a href="#">Homo sapiens</a> | 34.2      | 34.2        | 95%         | 0.18    | 95.24%    | 1732     | <a href="#">XR_001754065.1</a> |
| <input checked="" type="checkbox"/> | <a href="#">Homo sapiens centelin (CNTLN), transcript variant 2, mRNA</a>                                              | <a href="#">Homo sapiens</a> | 32.2      | 64.7        | 90%         | 0.72    | 95.00%    | 4666     | <a href="#">NM_001114395.3</a> |
| <input checked="" type="checkbox"/> | <a href="#">Homo sapiens uric acid element binding protein 2 (PUB2), mRNA</a>                                          | <a href="#">Homo sapiens</a> | 32.2      | 54.5        | 90%         | 0.72    | 95.00%    | 9232     | <a href="#">NM_033224.5</a>    |
| <input checked="" type="checkbox"/> | <a href="#">Homo sapiens centelin (CNTLN), transcript variant 1, mRNA</a>                                              | <a href="#">Homo sapiens</a> | 32.2      | 32.2        | 90%         | 0.72    | 95.00%    | 5518     | <a href="#">NM_017738.4</a>    |
| <input checked="" type="checkbox"/> | <a href="#">Homo sapiens centelin (CNTLN), transcript variant 5, mRNA</a>                                              | <a href="#">Homo sapiens</a> | 32.2      | 32.2        | 90%         | 0.72    | 95.00%    | 5515     | <a href="#">NM_001365029.1</a> |
| <input checked="" type="checkbox"/> | <a href="#">PREDICTED: Homo sapiens centelin (CNTLN), transcript variant X6, mRNA</a>                                  | <a href="#">Homo sapiens</a> | 32.2      | 32.2        | 90%         | 0.72    | 95.00%    | 4554     | <a href="#">XM_024447583.1</a> |
| <input checked="" type="checkbox"/> | <a href="#">PREDICTED: Homo sapiens centelin (CNTLN), transcript variant X4, mRNA</a>                                  | <a href="#">Homo sapiens</a> | 32.2      | 32.2        | 90%         | 0.72    | 95.00%    | 5366     | <a href="#">XM_006716793.4</a> |
| <input checked="" type="checkbox"/> | <a href="#">PREDICTED: Homo sapiens centelin (CNTLN), transcript variant X3, mRNA</a>                                  | <a href="#">Homo sapiens</a> | 32.2      | 32.2        | 90%         | 0.72    | 95.00%    | 4394     | <a href="#">XM_017014840.2</a> |
| <input checked="" type="checkbox"/> | <a href="#">PREDICTED: Homo sapiens centelin (CNTLN), transcript variant X10, misc. RNA</a>                            | <a href="#">Homo sapiens</a> | 32.2      | 32.2        | 90%         | 0.72    | 95.00%    | 3443     | <a href="#">XR_929282.2</a>    |
| <input checked="" type="checkbox"/> | <a href="#">PREDICTED: Homo sapiens centelin (CNTLN), transcript variant X9, mRNA</a>                                  | <a href="#">Homo sapiens</a> | 32.2      | 32.2        | 90%         | 0.72    | 95.00%    | 3341     | <a href="#">XM_017014843.1</a> |
| <input checked="" type="checkbox"/> | <a href="#">PREDICTED: Homo sapiens centelin (CNTLN), transcript variant X8, mRNA</a>                                  | <a href="#">Homo sapiens</a> | 32.2      | 32.2        | 90%         | 0.72    | 95.00%    | 4345     | <a href="#">XM_017014842.1</a> |
| <input checked="" type="checkbox"/> | <a href="#">PREDICTED: Homo sapiens centelin (CNTLN), transcript variant X7, mRNA</a>                                  | <a href="#">Homo sapiens</a> | 32.2      | 32.2        | 90%         | 0.72    | 95.00%    | 3344     | <a href="#">XM_011517941.2</a> |
| <input checked="" type="checkbox"/> | <a href="#">PREDICTED: Homo sapiens centelin (CNTLN), transcript variant X5, mRNA</a>                                  | <a href="#">Homo sapiens</a> | 32.2      | 32.2        | 90%         | 0.72    | 95.00%    | 5372     | <a href="#">XM_017014841.1</a> |
| <input checked="" type="checkbox"/> | <a href="#">PREDICTED: Homo sapiens centelin (CNTLN), transcript variant X2, mRNA</a>                                  | <a href="#">Homo sapiens</a> | 32.2      | 32.2        | 90%         | 0.72    | 95.00%    | 5682     | <a href="#">XM_017014839.1</a> |
| <input checked="" type="checkbox"/> | <a href="#">PREDICTED: Homo sapiens uncharacterized LOC105373942 (LOC105373942), transcript variant X2, ncRNA</a>      | <a href="#">Homo sapiens</a> | 30.2      | 54.5        | 86%         | 2.8     | 100.00%   | 7232     | <a href="#">XR_001739942.2</a> |
| <input checked="" type="checkbox"/> | <a href="#">Homo sapiens microtubule associated monooxygenase, calponin and LIM domain containing 2 (MICAL2), tr--</a> | <a href="#">Homo sapiens</a> | 30.2      | 30.2        | 86%         | 2.8     | 94.74%    | 6658     | <a href="#">NM_001282666.1</a> |
| <input checked="" type="checkbox"/> | <a href="#">Homo sapiens microtubule associated monooxygenase, calponin and LIM domain containing 2 (MICAL2), tr--</a> | <a href="#">Homo sapiens</a> | 30.2      | 30.2        | 86%         | 2.8     | 94.74%    | 4259     | <a href="#">NM_001282665.1</a> |
| <input checked="" type="checkbox"/> | <a href="#">Homo sapiens lamin subunit alpha 3 (LAMA3), transcript variant 2, mRNA</a>                                 | <a href="#">Homo sapiens</a> | 28.2      | 28.2        | 81%         | 11      | 94.44%    | 5618     | <a href="#">NM_000227.8</a>    |
| <input checked="" type="checkbox"/> | <a href="#">Homo sapiens lamin subunit alpha 3 (LAMA3), transcript variant 4, mRNA</a>                                 | <a href="#">Homo sapiens</a> | 28.2      | 28.2        | 81%         | 11      | 94.44%    | 5450     | <a href="#">NM_001127718.4</a> |
| <input checked="" type="checkbox"/> | <a href="#">Homo sapiens lamin subunit alpha 3 (LAMA3), transcript variant 3, mRNA</a>                                 | <a href="#">Homo sapiens</a> | 28.2      | 28.2        | 81%         | 11      | 94.44%    | 10483    | <a href="#">NM_001127717.4</a> |
| <input checked="" type="checkbox"/> | <a href="#">Homo sapiens lamin subunit alpha 3 (LAMA3), transcript variant 1, mRNA</a>                                 | <a href="#">Homo sapiens</a> | 28.2      | 28.2        | 81%         | 11      | 94.44%    | 10651    | <a href="#">NM_198129.4</a>    |
| <input checked="" type="checkbox"/> | <a href="#">Homo sapiens ral guanine nucleotide dissociation stimulator like 1 (RGL1), transcript variant 4, mRNA</a>  | <a href="#">Homo sapiens</a> | 28.2      | 28.2        | 81%         | 11      | 94.44%    | 4725     | <a href="#">NM_001297871.3</a> |
| <input checked="" type="checkbox"/> | <a href="#">Homo sapiens FKBP prolyl isomerase 14 (FKBP14), transcript variant 1, mRNA</a>                             | <a href="#">Homo sapiens</a> | 28.2      | 28.2        | 81%         | 11      | 94.44%    | 4978     | <a href="#">NM_017946.1</a>    |
| <input checked="" type="checkbox"/> | <a href="#">Homo sapiens ral guanine nucleotide dissociation stimulator like 1 (RGL1), transcript variant 2, mRNA</a>  | <a href="#">Homo sapiens</a> | 28.2      | 28.2        | 81%         | 11      | 94.44%    | 5076     | <a href="#">NM_001297869.3</a> |
| <input checked="" type="checkbox"/> | <a href="#">Homo sapiens ral guanine nucleotide dissociation stimulator like 1 (RGL1), transcript variant 5, mRNA</a>  | <a href="#">Homo sapiens</a> | 28.2      | 28.2        | 81%         | 11      | 94.44%    | 4638     | <a href="#">NM_001297872.3</a> |
| <input checked="" type="checkbox"/> | <a href="#">Homo sapiens ral guanine nucleotide dissociation stimulator like 1 (RGL1), transcript variant 1, mRNA</a>  | <a href="#">Homo sapiens</a> | 28.2      | 28.2        | 81%         | 11      | 94.44%    | 5077     | <a href="#">NM_015149.6</a>    |
| <input checked="" type="checkbox"/> | <a href="#">Homo sapiens ral guanine nucleotide dissociation stimulator like 1 (RGL1), transcript variant 3, mRNA</a>  | <a href="#">Homo sapiens</a> | 28.2      | 28.2        | 81%         | 11      | 94.44%    | 4966     | <a href="#">NM_001297870.3</a> |
| <input checked="" type="checkbox"/> | <a href="#">Homo sapiens Rho GTPase activating protein 30 (ARHGAP30), transcript variant 3, mRNA</a>                   | <a href="#">Homo sapiens</a> | 32.2      | 32.2        | 72%         | 0.72    | 100.00%   | 4197     | <a href="#">NM_001287600.2</a> |
| <input checked="" type="checkbox"/> | <a href="#">Homo sapiens Rho GTPase activating protein 30 (ARHGAP30), transcript variant 4, mRNA</a>                   | <a href="#">Homo sapiens</a> | 32.2      | 32.2        | 72%         | 0.72    | 100.00%   | 3811     | <a href="#">NM_001287602.2</a> |
| <input checked="" type="checkbox"/> | <a href="#">Homo sapiens Rho GTPase activating protein 30 (ARHGAP30), transcript variant 1, mRNA</a>                   | <a href="#">Homo sapiens</a> | 32.2      | 32.2        | 72%         | 0.72    | 100.00%   | 4342     | <a href="#">NM_001025588.2</a> |
| <input checked="" type="checkbox"/> | <a href="#">PREDICTED: Homo sapiens uncharacterized LOC105377508 (LOC105377508), transcript variant X2, ncRNA</a>      | <a href="#">Homo sapiens</a> | 32.2      | 32.2        | 72%         | 0.72    | 100.00%   | 3572     | <a href="#">XR_939398.2</a>    |
| <input checked="" type="checkbox"/> | <a href="#">PREDICTED: Homo sapiens uncharacterized LOC105377508 (LOC105377508), transcript variant X1, ncRNA</a>      | <a href="#">Homo sapiens</a> | 32.2      | 32.2        | 72%         | 0.72    | 100.00%   | 3589     | <a href="#">XR_939397.2</a>    |
| <input checked="" type="checkbox"/> | <a href="#">PREDICTED: Homo sapiens Rho GTPase activating protein 30 (ARHGAP30), transcript variant X4, mRNA</a>       | <a href="#">Homo sapiens</a> | 32.2      | 32.2        | 72%         | 0.72    | 100.00%   | 4178     | <a href="#">XM_005245073.3</a> |
| <input checked="" type="checkbox"/> | <a href="#">PREDICTED: Homo sapiens Rho GTPase activating protein 30 (ARHGAP30), transcript variant X3, mRNA</a>       | <a href="#">Homo sapiens</a> | 32.2      | 32.2        | 72%         | 0.72    | 100.00%   | 4256     | <a href="#">XM_011509391.2</a> |
| <input checked="" type="checkbox"/> | <a href="#">PREDICTED: Homo sapiens Rho GTPase activating protein 30 (ARHGAP30), transcript variant X2, mRNA</a>       | <a href="#">Homo sapiens</a> | 32.2      | 32.2        | 72%         | 0.72    | 100.00%   | 4023     | <a href="#">XM_017009860.1</a> |
| <input checked="" type="checkbox"/> | <a href="#">PREDICTED: Homo sapiens Rho GTPase activating protein 30 (ARHGAP30), transcript variant X1, mRNA</a>       | <a href="#">Homo sapiens</a> | 32.2      | 32.2        | 72%         | 0.72    | 100.00%   | 4254     | <a href="#">XM_005245070.2</a> |

**Figure S4. RNA Reference Sequence (RefSeq) analysis for similarities of ASO2's target with bacterial and human organisms in the GeneBank database.**

**(A)** RefSeq results for similarities of ASO2's target with bacterial microorganisms. **(B)** RefSeq for similarities of ASO2's target within the human organism. With blue lines and arrows marked, the two types of maximum % hits are either query cover but lack of whole identity or the complete 100% identity with lower query cover than the targeted sequence.



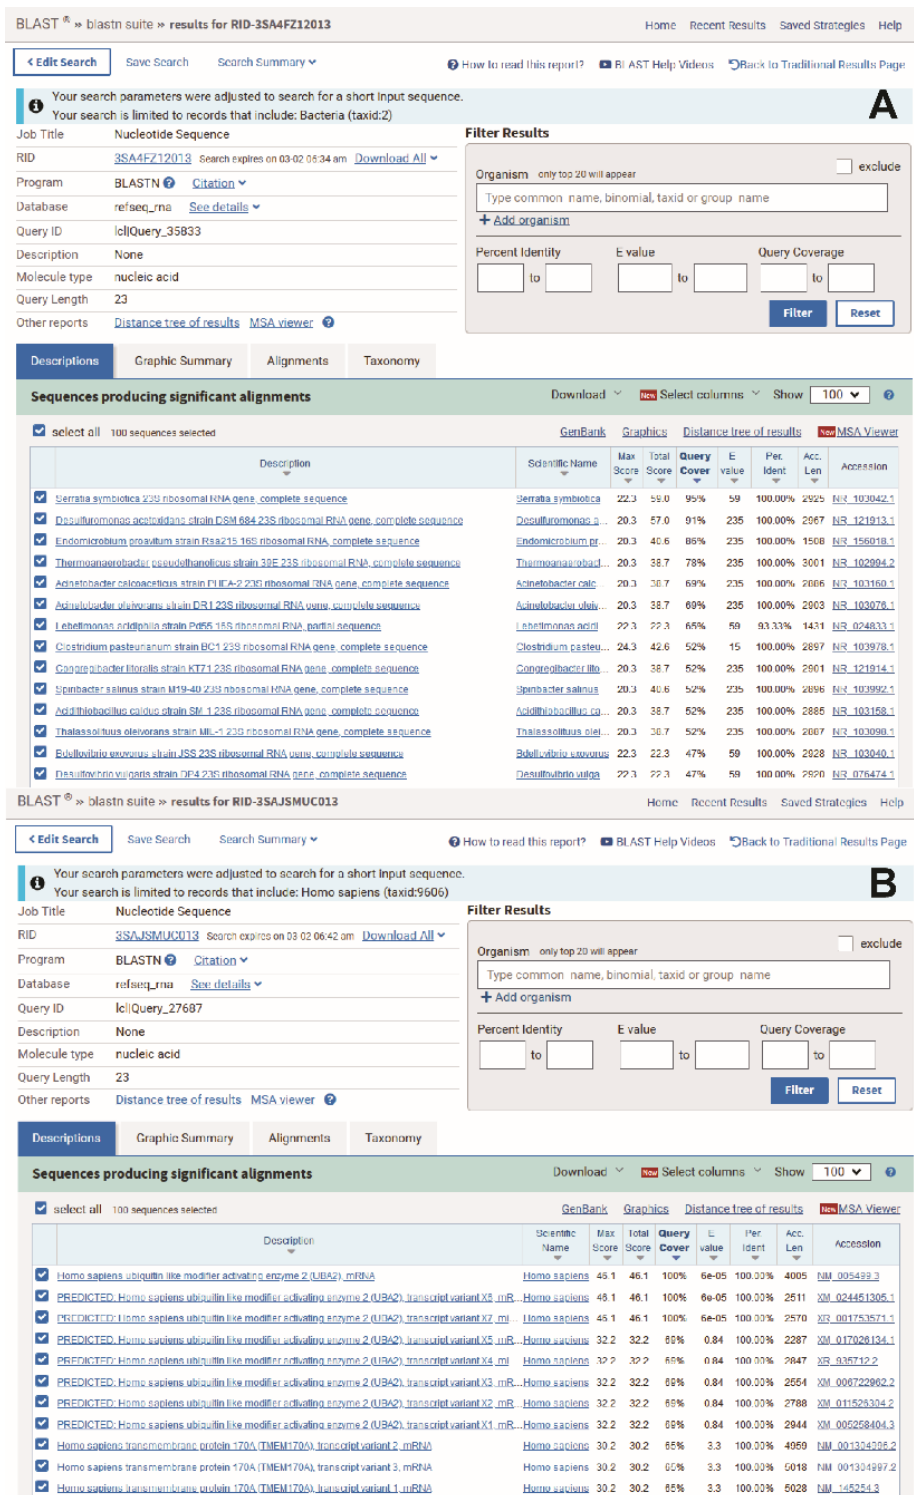

**Figure S5. RNA Reference Sequence (RefSeq) analysis for similarities of ASO3's target with bacterial and human organisms in the GeneBank database.**

**(A)** RefSeq results for similarities of ASO3's target with bacterial microorganisms. **(B)** RefSeq for similarities of ASO3's target within the human organism.

BLAST® » blastn suite » results for RID-3S9E5DNE013 Home Recent Results Saved Strategies Help

[← Edit Search](#) [Save Search](#) [Search Summary](#) [How to read this report?](#) [BLAST Help Videos](#) [Back to Traditional Results Page](#)

**i** Your search parameters were adjusted to search for a short input sequence.

|               |                                                                                             |
|---------------|---------------------------------------------------------------------------------------------|
| Job Title     | ASO4 target sequence                                                                        |
| RID           | <a href="#">3S9E5DNE013</a> Search expires on 03-02 06:22 am <a href="#">Download All</a> ▼ |
| Program       | <a href="#">?</a> <a href="#">Citation</a> ▼                                                |
| Database      | refseq_rna <a href="#">See details</a> ▼                                                    |
| Query ID      | lcl Query_54379                                                                             |
| Description   | None                                                                                        |
| Molecule type | nucleic acid                                                                                |
| Query Length  | 11                                                                                          |
| Other reports | <a href="#">?</a>                                                                           |

**Filter Results**

|                                              |                                              |                                              |
|----------------------------------------------|----------------------------------------------|----------------------------------------------|
| Percent Identity                             | E value                                      | Query Coverage                               |
| <input type="text"/> to <input type="text"/> | <input type="text"/> to <input type="text"/> | <input type="text"/> to <input type="text"/> |
|                                              |                                              | <a href="#">Filter</a> <a href="#">Reset</a> |

**A** No significant similarity found. For reasons why [click here](#)

**Figure S6.** RNA Reference Sequence (RefSeq) analyzes similarities of ASO4's hypothetical target with all organisms in the GeneBank database.

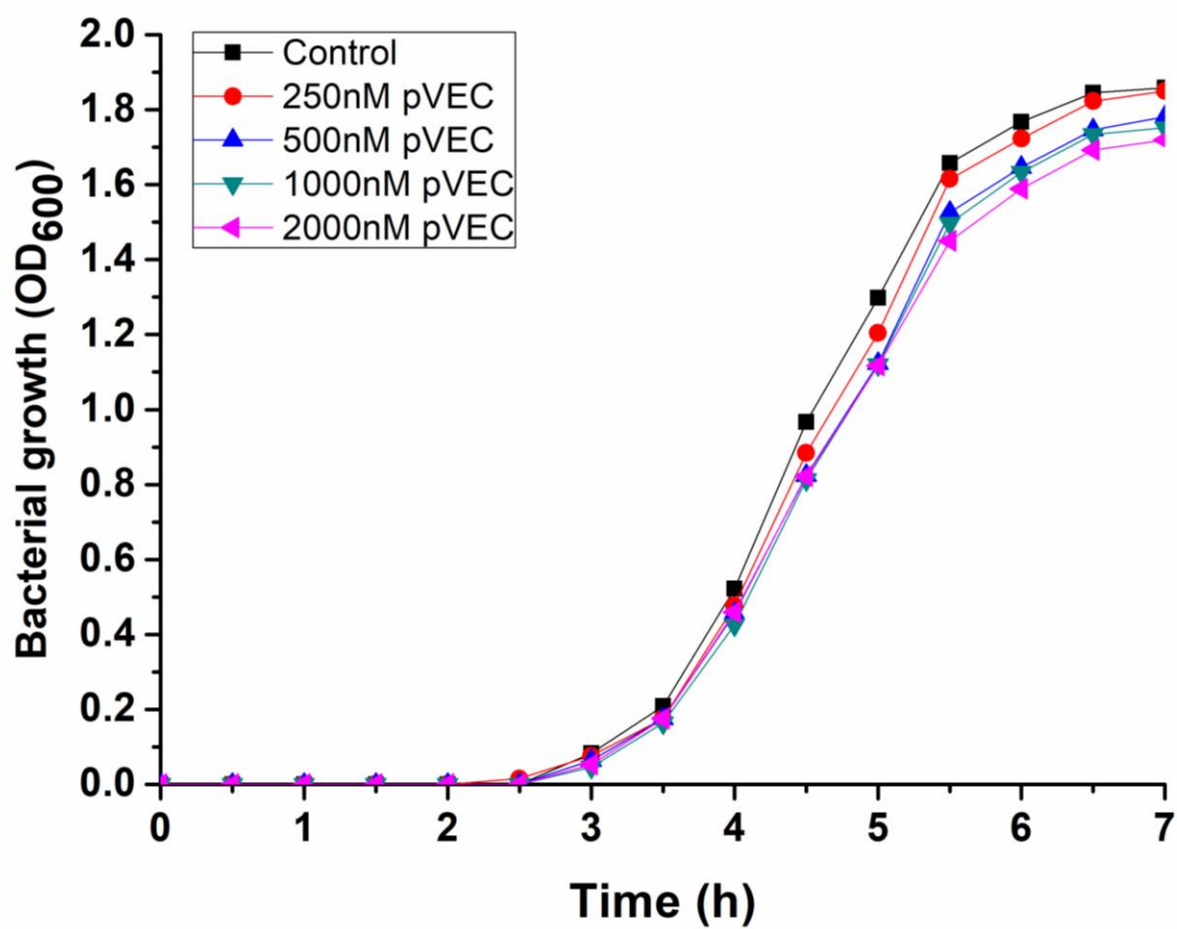

**Figure S7.** Growth curve of *S. aureus* (strain ATCC 25 923) cultured in LB medium. Bacteria were treated with different concentrations of pVEC: 250nM (red line), 500nM (blue line), 1000nM (green line), and 2000nM (purple line). Treated bacteria were compared to the control with untreated bacteria (black line). The measurements were assessed in cuvettes by spectrophotometer at 600nm wavelength.

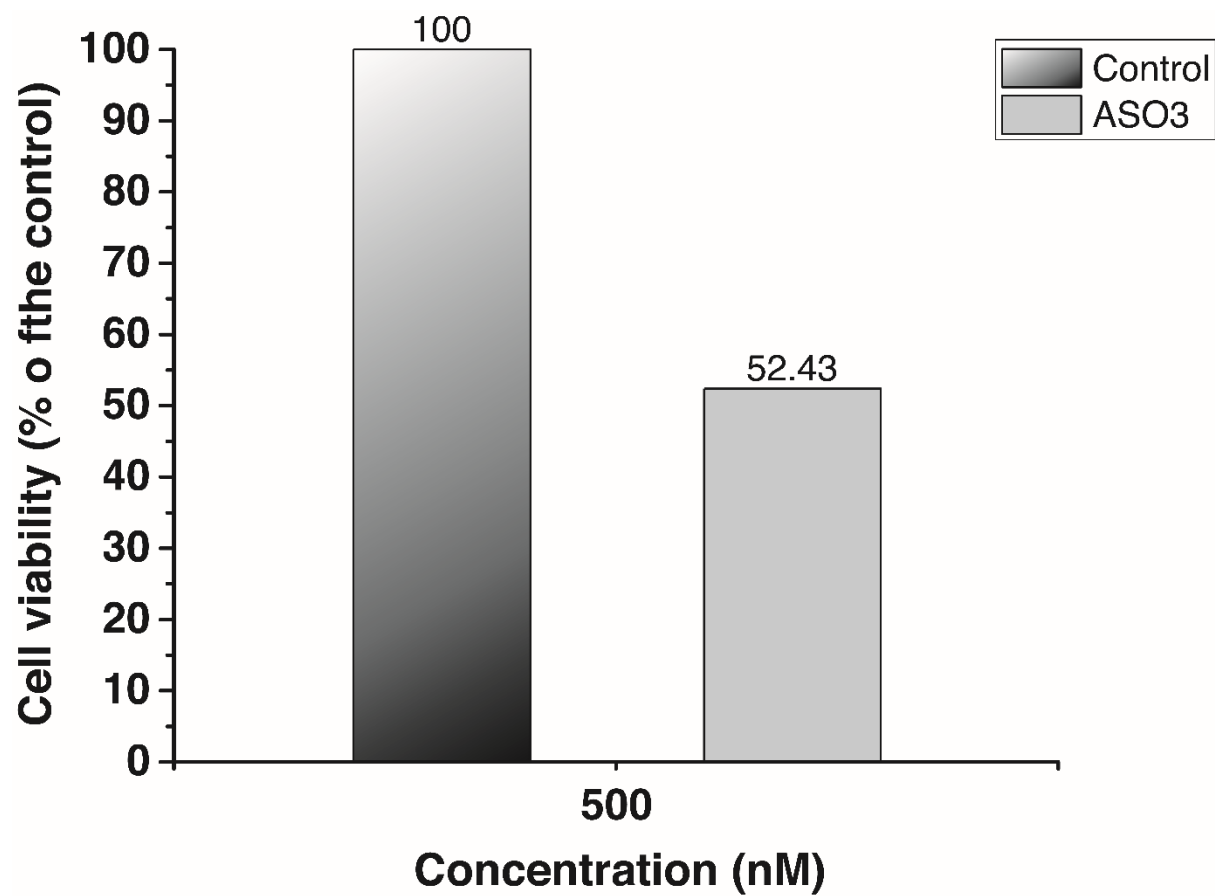

**Figure S8. MTT viability assay** of the colorectal adenocarcinoma HT29 cell line was measured at 540/620nm. Results are expressed as the percentage of the cell viability relative to the control. The 500nM pVEC-ASO3 is tested after exposure for 72h.
